# Supplementary material
Source: PubMed Central journal article supplement (PMC6333425)

Figure S1.

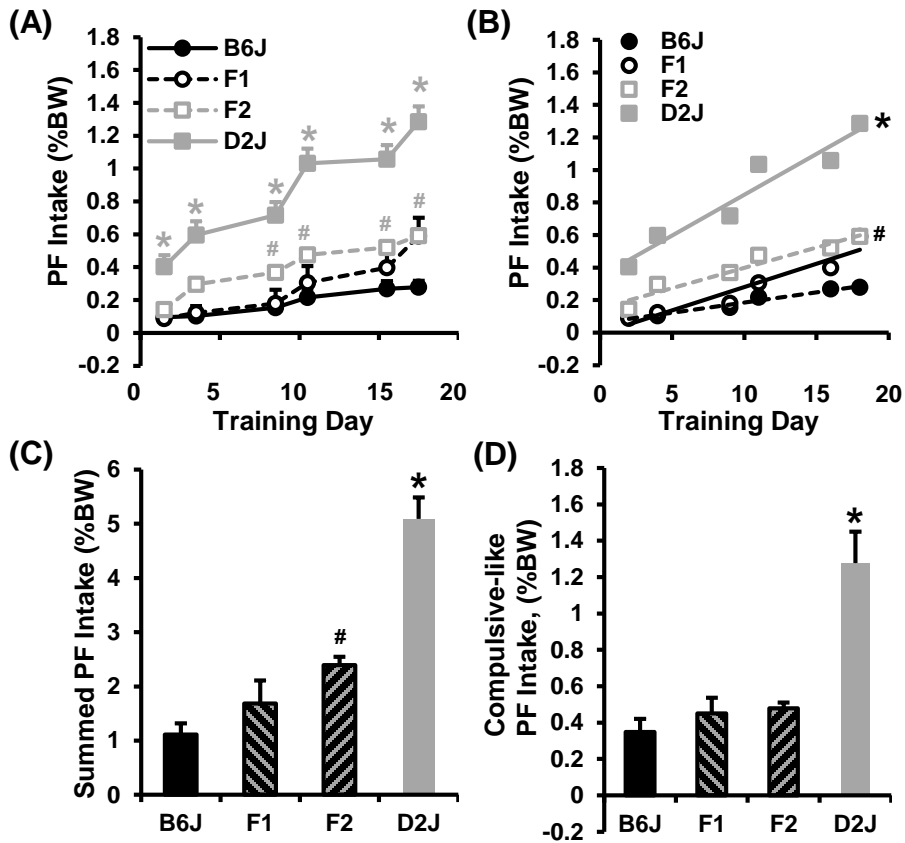

Supplement: NIHMS1509359-supplement-3.pdf [file NIHMS1509359-supplement-3.pdf]

Figure S2.

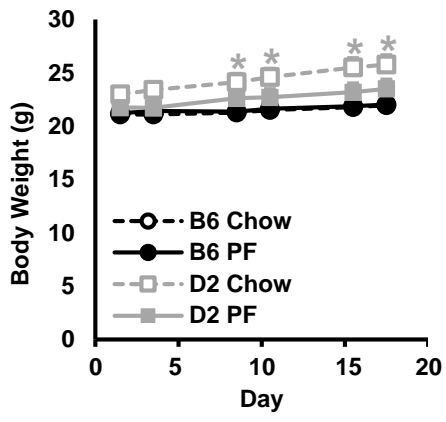

Supplement: NIHMS1509359-supplement-4.pdf [file NIHMS1509359-supplement-4.pdf]
